# Supplementary material for: Comparative Study of the Preparation of High-Molecular-Weight Fibroin by Degumming Silk with Several Neutral Proteases
Source: MDPI journal article supplement (doi:10.3390/polym15163383), 2023-08-12
Supplement: s1 [file s1]

## Supplementary materials

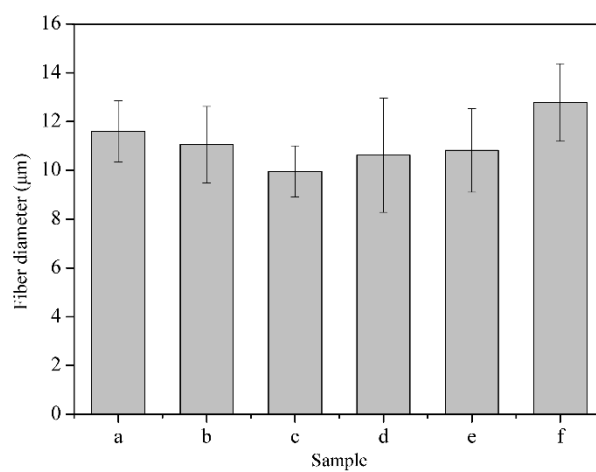

**Figure S1.** The diameters of degummed silk fibers and raw silk. **(a)** subtilisin-silk; **(b)** trypsin-silk; **(c)** bromelain-silk; **(d)** papain-silk; **(e)** Na<sub>2</sub>CO<sub>3</sub>-silk; **(f)** raw silk.
